# Supplementary material for: Profiling cancer-related gene mutations in oral squamous cell carcinoma from Japanese patients by targeted amplicon sequencing
Source: PubMed Central journal article supplement (PMC5601718; doi:10.18632/oncotarget.19262), 2017-07-15
Supplement: oncotarget-08-59113-s001.pdf [file oncotarget-08-59113-s001.pdf]

## Profiling cancer-related gene mutations in oral squamous cell carcinoma from Japanese patients by targeted amplicon sequencing

### SUPPLEMENTARY MATERIALS

|          |         |         |          |        |        |         |         |          |
|----------|---------|---------|----------|--------|--------|---------|---------|----------|
| ABL1     | BTK     | DDR2    | FLT1     | ITGA9  | MLH1   | PAK3    | RALGDS  | TCF12    |
| ABL2     | BUB1B   | DEK     | FLT3     | ITGB2  | MLL    | PAX5    | RARA    | TCF3     |
| ACVR2A   | CARD11  | DICER1  | FLT4     | ITGB3  | MLL2   | PAX7    | RB1     | TCF7L1   |
| ADAMTS20 | CASC5   | DNMT3A  | FN1      | JAK1   | MLL3   | PALB2   | RECQL4  | TCF7L2   |
| AFF1     | GBL     | DPYD    | FOXL2    | JAK2   | MLLT10 | PARP1   | REL     | TCL1A    |
| AFF3     | CCND1   | DST     | FOXO1    | JAK3   | MMP2   | PAX3    | RET     | TET1     |
| AKAP9    | CCND2   | EGFR    | FOXO3    | JUN    | MN1    | PAX8    | RHOH    | TET2     |
| AKT1     | CCNE1   | EML4    | FOXP1    | KAT6A  | MPL    | PBRM1   | RNASEL  | TFE3     |
| AKT2     | CD79A   | EP300   | FOXP4    | KAT6B  | MRE11A | PBX1    | RNF2    | TGFBR2   |
| AKT3     | CD79B   | EP400   | FZR1     | KDM5C  | MSH2   | PDE4DIP | RNF213  | TGM7     |
| ALK      | CDC73   | EPHA3   | G6PD     | KDM6A  | MSH6   | PDGFB   | ROS1    | THBS1    |
| APC      | CDH1    | EPHA7   | GATA1    | KDR    | MTOR   | PDGFRA  | RPS6KA2 | TIMP3    |
| AR       | CDH11   | EPHB1   | GATA2    | KEAP1  | MTR    | PDGFRB  | RRM1    | TLR4     |
| ARID1A   | CDH2    | EPHB4   | GATA3    | KIT    | MTRR   | PER1    | RUNX1   | TLX1     |
| ARID2    | CDH20   | EPHB6   | GDNF     | KLF6   | MUC1   | PGAP3   | RUNX1T1 | TNFAIP3  |
| ARNT     | CDH5    | ERBB2   | GNA11    | KRAS   | MUTYH  | PHOX2B  | SAMD9   | TNFRSF14 |
| ASXL1    | CDK12   | ERBB3   | GNAQ     | LAMP1  | MYB    | PIK3C2B | SBDS    | TNK2     |
| ATF1     | CDK4    | ERBB4   | GNAS     | LCK    | MYC    | PIK3CA  | SDHA    | TOP1     |
| ATM      | CDK6    | ERCC1   | GPR124   | LIFR   | MYCL1  | PIK3CB  | SDHB    | TP53     |
| ATR      | CDK8    | ERCC2   | GRM8     | LPHN3  | MYCN   | PIK3CD  | SDHC    | TPR      |
| ATRX     | CDKN2A  | ERCC3   | GUCY1A2  | POT1   | MYD88  | PIK3CG  | SDHD    | TRIM24   |
| AURKA    | CDKN2B  | ERCC4   | HCAR1    | LPP    | MYH11  | PIK3R1  | SEPT9   | TRIM33   |
| AURKB    | CDKN2C  | ERCC5   | HIF1A    | LRP1B  | MYH9   | PIK3R2  | SETD2   | TRIP11   |
| AURKC    | CEBPA   | ERG     | HLF      | LTF    | NBN    | PIM1    | SF3B1   | TRRAP    |
| AXL      | CHEK1   | ESR1    | HNF1A    | LTK    | NCOA1  | PKHD1   | SGK1    | TSC1     |
| BAI3     | CHEK2   | ETS1    | HOOK3    | MAF    | NCOA2  | PLAG1   | SH2D1A  | TSC2     |
| BAP1     | CIC     | ETV1    | HRAS     | MAFB   | NCOA4  | PLCG1   | SMAD2   | TSHR     |
| BCL10    | CKS1B   | ETV4    | HSP90AA1 | MAGEA1 | NF1    | PLEKHG5 | SMAD4   | UBR5     |
| BCL11A   | CMPK1   | EXT1    | HSP90AB1 | MAGI1  | NF2    | PML     | SMARCA4 | UGT1A1   |
| BCL11B   | COL1A1  | EXT2    | ICK      | MALT1  | NFE2L2 | PMS1    | SMARCB1 | USP9X    |
| BCL2     | GRBN    | EZH2    | IDH1     | MAML2  | NFKB1  | PMS2    | SMO     | VHL      |
| BCL2L1   | CREB1   | FAM123B | IDH2     | MAP2K1 | NFKB2  | POU5F1  | SMUG1   | WAS      |
| BCL2L2   | CREBBP  | FANCA   | IGF1R    | MAP2K2 | NIN    | PPARG   | SOCS1   | WHSC1    |
| BCL3     | CRKL    | FANCC   | IGF2     | MAP2K4 | NKX2-1 | PPP2R1A | SOX11   | WRN      |
| BCL6     | CRTC1   | FANCD2  | IGF2R    | MAP3K7 | NLRP1  | PRDM1   | SOX2    | WT1      |
| BCL9     | GSF1R   | FANCF   | IKBKB    | MAPK1  | NOTCH1 | PRKAR1A | SRC     | XPA      |
| BCR      | CSMD3   | FANCG   | IKBKE    | MAPK8  | NOTCH2 | PRKDC   | SSX1    | XPC      |
| BIRC2    | CTNNA1  | FAS     | IKZF1    | MARK1  | NOTCH4 | PSIP1   | STK11   | XPO1     |
| BIRC3    | CTNNB1  | FBXW7   | IL2      | MARK4  | NPM1   | PTCH1   | STK36   | XRCC2    |
| BIRC5    | CYLD    | FGFR1   | IL21R    | MBD1   | NRAS   | PTEN    | SUFU    | ZNF384   |
| BLM      | CYP2C19 | FGFR2   | IL6ST    | MCL1   | NSD1   | PTGS2   | SYK     | ZNF521   |
| BLNK     | CYP2D6  | FGFR3   | IL7R     | MDM2   | NTRK1  | PTPN11  | SYNE1   |          |
| BMPR1A   | DAXX    | FGFR4   | ING4     | MDM4   | NTRK3  | PTPRD   | TAF1    |          |
| BRAF     | DCC     | FH      | IRF4     | MEN1   | NUMA1  | PTPRT   | TAF1L   |          |
| BRD3     | DDB2    | FLCN    | IRS2     | MET    | NUP214 | RAD50   | TAL1    |          |
| BRIP1    | DDIT3   | FLI1    | ITGA10   | MITF   | NUP98  | RAF1    | TBX22   |          |

Supplementary Figure 1: Ion Ampliseq Comprehensive Cancer Panel gene list.

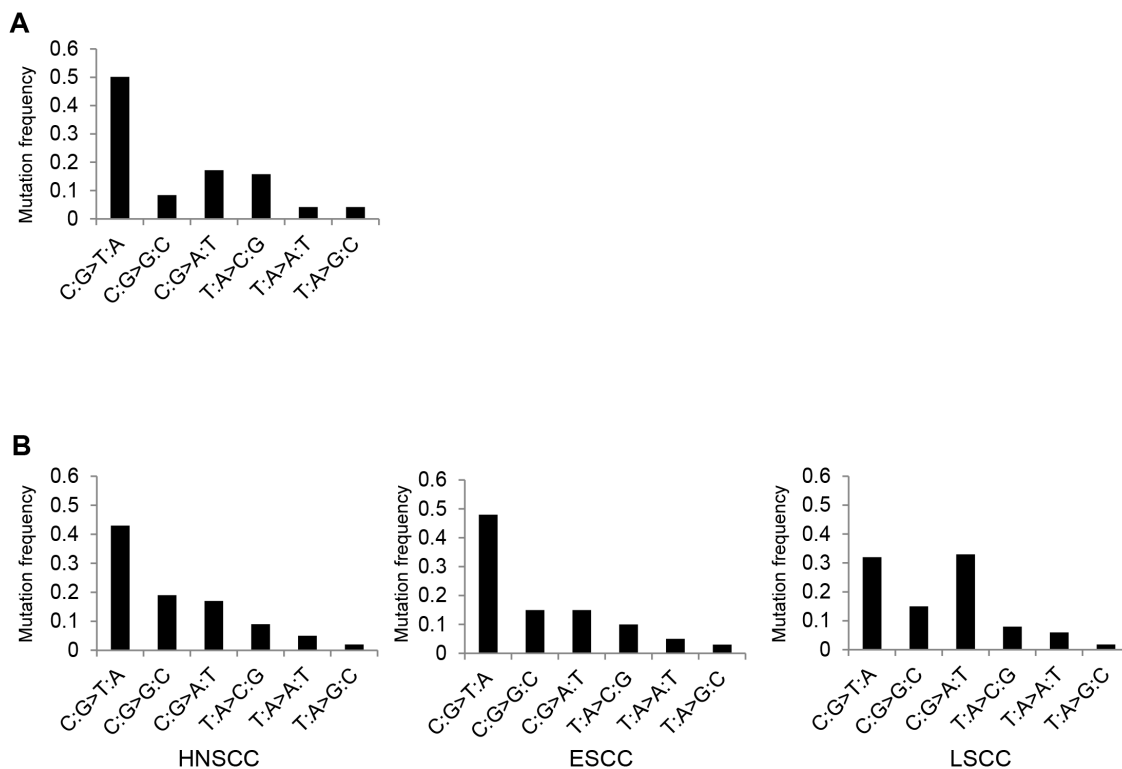

**Supplementary Figure 2: Mutation spectrum of single nucleotide substitutions.** (A) The major nucleotide change was a C/G>T/A transition in this study. The second most frequent mutation was a C/G>A/T transversion. (B) Spectrum of single nucleotide substitutions in the exome-sequencing studies of head and neck (HNSCC), esophageal (ESCC), and lung squamous cell carcinoma (LSCC) [1] (Song Y et al. Nature 2014; 509:91-95).

## SUPPLEMENTARY REFERENCE

1. Song Y, Li L, Ou Y, Gao Z, Li E, Li X, Zhang W, Wang J, Xu L, Zhou Y, Ma X, Liu L, Zhao Z, et al. Identification of genomic alterations in oesophageal squamous cell cancer. Nature. 2014; 509:91-5.

**TP53**

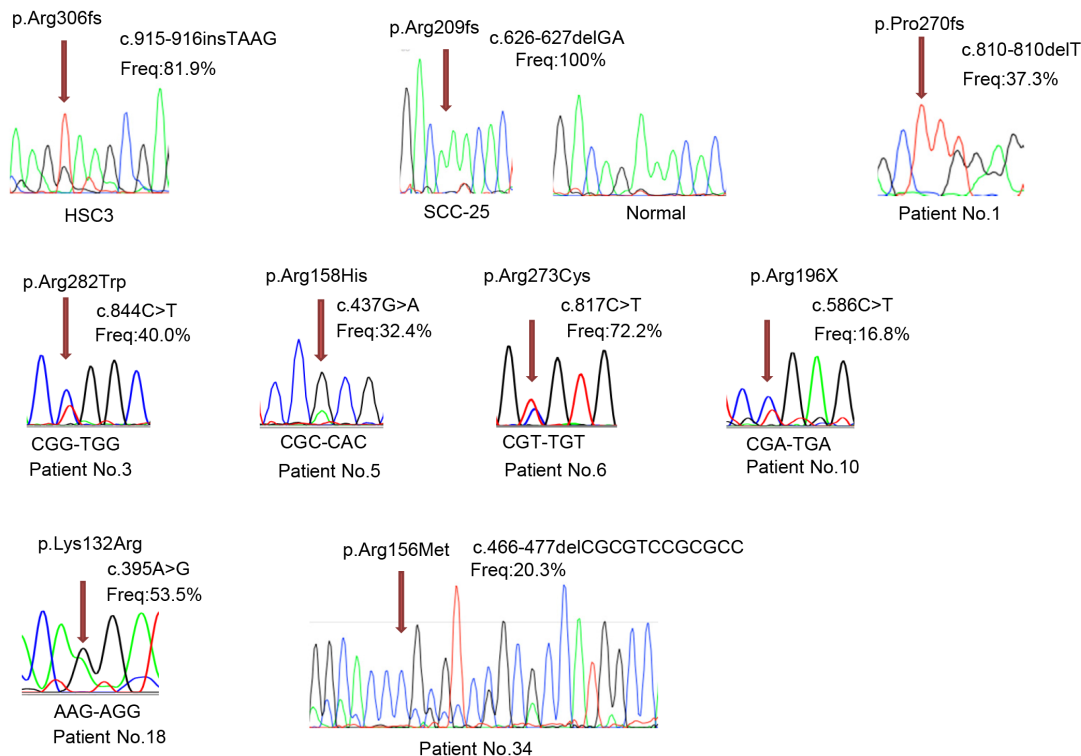

**NOTCH1**

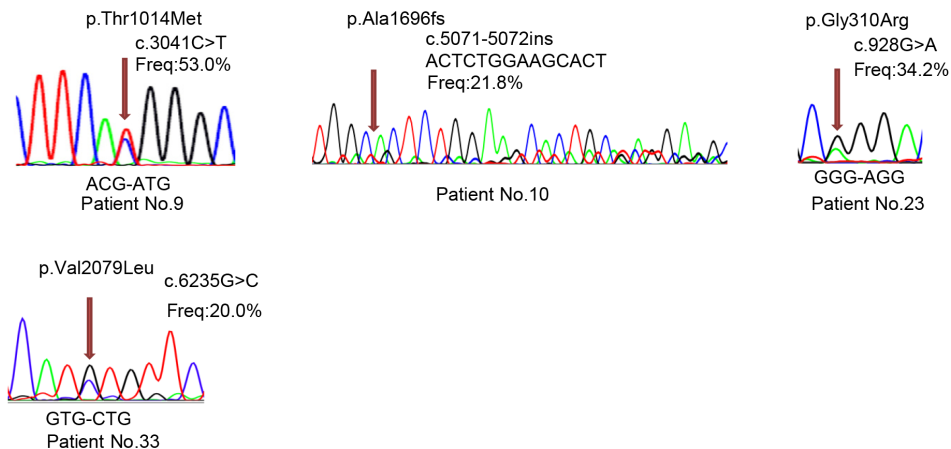

**CDKN2A**

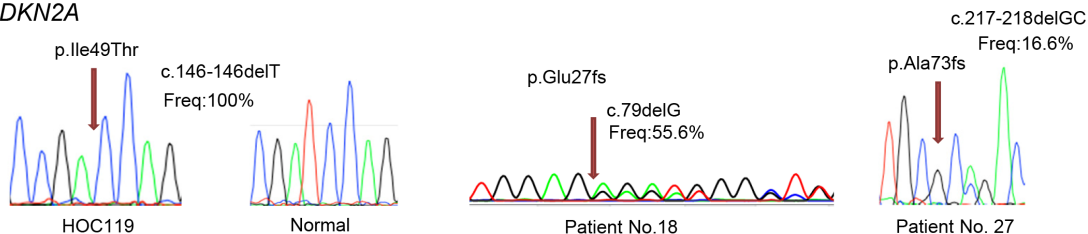

(Continued)

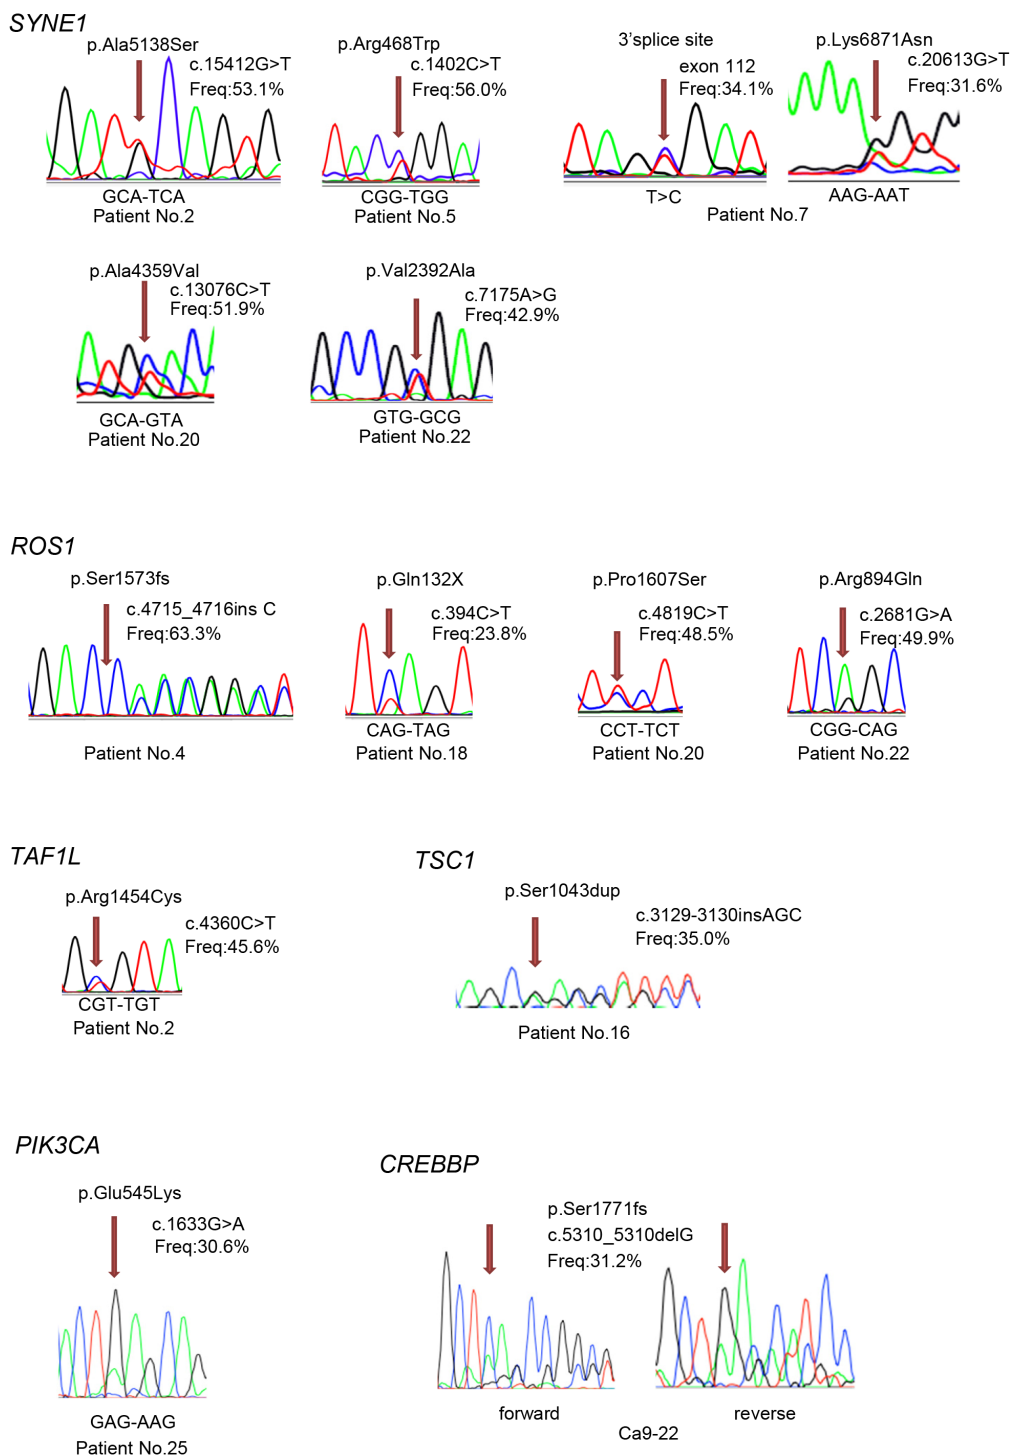

**Supplementary Figure 3: Verification of identified mutations by Sanger sequencing.** Sanger sequencing traces for 30 variants (19 SNVs and 11 InDels) are shown. The position of the called variant is indicated by an arrow. The variant effect, cDNA position, and variant frequency are also given.

**A**

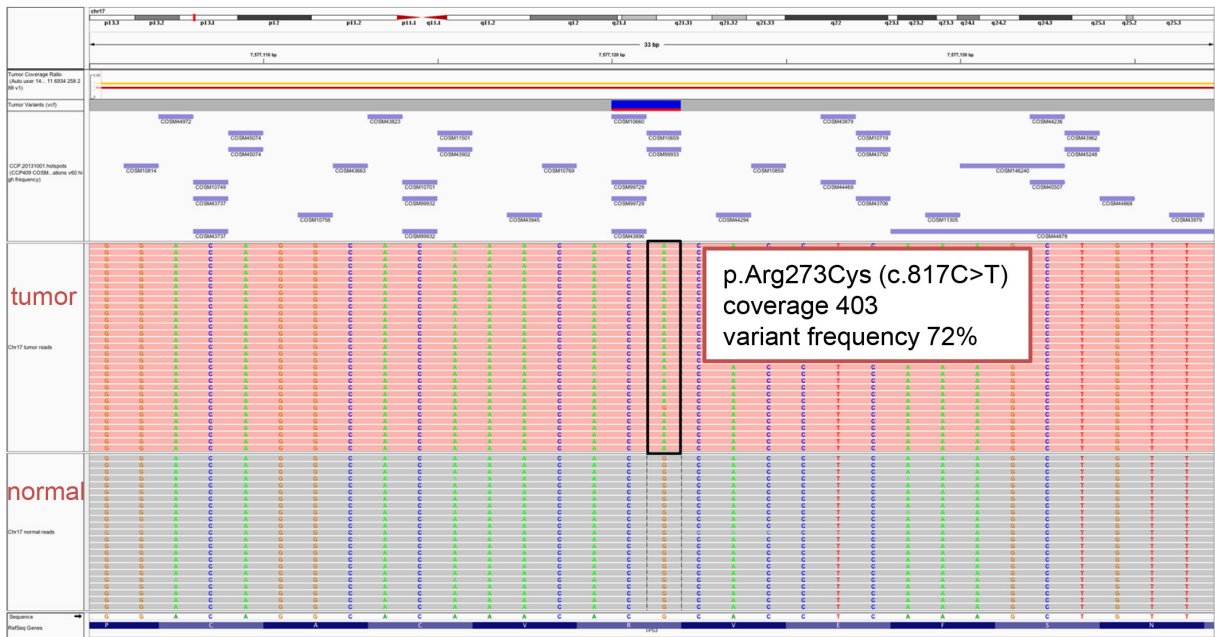

**B**

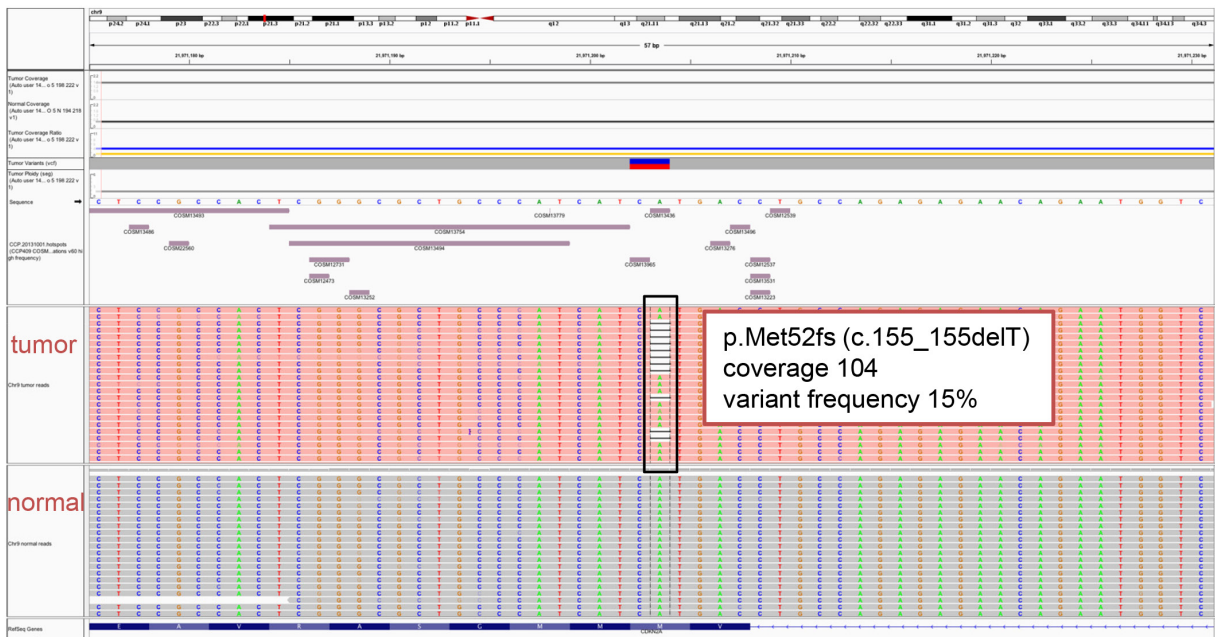

**Supplementary Figure 4: Examples of SNVs and InDels detected by NGS.** Two types of nonsynonymous mutations from OSCC patients as shown by the IGV. **(A)** A missense mutation detected in exon 8 of the *TP53* gene (p.Arg273Cys, c.817C>T) in patient No. 6. **(B)** A 1-bp deletion detected in exon 2 of the *CDKN2A* gene (c.155\_155delT) in patient No. 14.

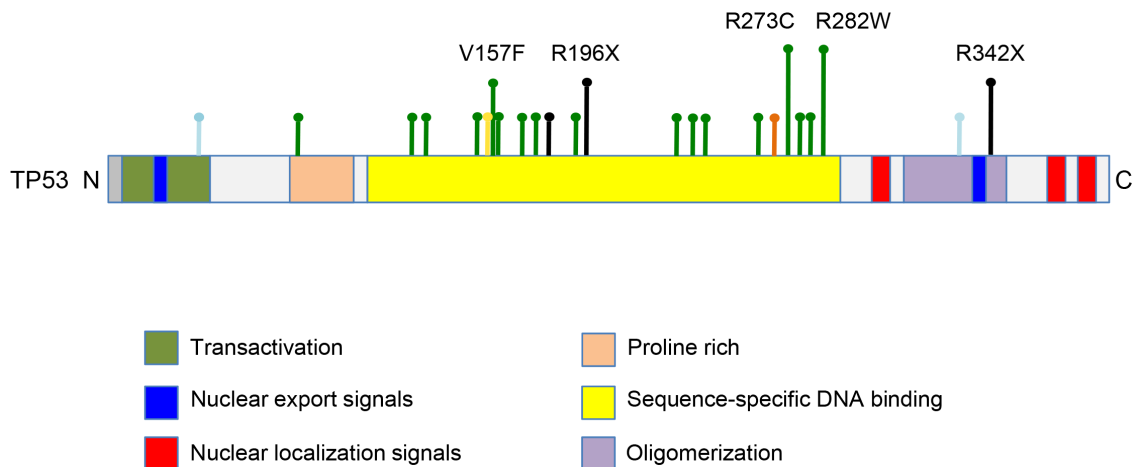

**Supplementary Figure 5: Mutation distribution in the function domains of *TP53* in OSCC tumors.** Any position with a mutation contains a circle (green, missense mutation; black, nonsense mutation; yellow, in-frame deletion; orange, frameshift deletion; and blue, splice site mutation), and the length of the line depends on the number of mutations detected at that codon. The colored boxes are specific functional domains. Above the lollipops, the frequent variants are annotated as the amino-acid change at that specific site.

Patient No.23

|       |     |   |   |   |   |   |   |   |   |   |   |   |     |
|-------|-----|---|---|---|---|---|---|---|---|---|---|---|-----|
| HUMAN | 305 | A | C | Q | N | G | G | T | C | H | N | T | 315 |
| MACMU | 305 | A | C | Q | N | G | G | T | C | H | N | T | 315 |
| MOUSE | 305 | A | C | Q | N | G | G | T | C | H | N | T | 315 |
| CHICK | 308 | A | C | Q | N | G | G | T | C | H | N | N | 318 |
| ANOCA | 310 | A | C | Q | N | G | G | T | C | H | N | T | 319 |
| XENLA | 304 | A | C | Q | N | G | G | T | C | H | N | T | 314 |
| DANRE | 304 | A | C | Q | N | G | G | T | C | H | N | T | 314 |
| BILA  | 945 | N | Y | P | D | N | S | E | C | S | W | K | 955 |

Gly310Arg

Patient No.4

|  |      |   |   |   |   |   |   |   |   |   |   |   |      |
|--|------|---|---|---|---|---|---|---|---|---|---|---|------|
|  | 347  | G | A | T | C | H | D | R | V | A | S | F | 357  |
|  | 347  | G | A | T | C | H | D | R | V | A | - | - | 355  |
|  | 347  | G | A | T | C | H | D | R | V | A | - | - | 355  |
|  | 350  | G | A | T | C | H | D | R | V | A | - | - | 358  |
|  | 351  | G | A | T | C | H | D | R | V | A | S | F | 361  |
|  | 346  | G | A | T | C | H | D | R | V | A | - | - | 354  |
|  | 346  | G | A | T | C | H | D | R | V | A | - | - | 354  |
|  | 1010 | G | A | T | C | H | D | R | V | K | N | I | 1020 |

Asp352Gly

Patient No.37

|       |      |   |   |   |   |   |   |   |   |   |   |   |      |
|-------|------|---|---|---|---|---|---|---|---|---|---|---|------|
| HUMAN | 360  | E | C | P | H | G | R | T | G | L | L | C | 370  |
| MACMU | 361  | - | C | P | H | G | R | T | G | L | L | C | 370  |
| MOUSE | 361  | - | C | P | H | G | R | T | G | L | L | C | 370  |
| CHICK | 364  | - | C | P | H | G | R | T | G | L | L | C | 373  |
| ANOCA | 364  | E | C | P | H | G | R | T | G | L | L | C | 374  |
| XENLA | 360  | - | C | P | H | G | R | T | G | L | L | C | 369  |
| DANRE | 360  | - | C | P | H | G | R | T | G | - | - | - | 266  |
| BILA  | 1029 | S | S | V | N | S | R | A | S | G | - | - | 1037 |

Arg365Cys

Patient No.9

|      |   |   |   |   |   |   |   |   |   |   |      |      |
|------|---|---|---|---|---|---|---|---|---|---|------|------|
| 1009 | C | P | P | G | F | T | G | S | Y | C | Q    | 1019 |
| 1009 | C | P | P | G | F | T | G | S | Y | C | Q    | 1019 |
| 1009 | C | P | P | G | F | T | G | S | Y | C | Q    | 1019 |
| 1012 | C | P | S | G | F | T | G | S | Y | C | E    | 1022 |
| 1013 | C | P | P | G | F | T | G | I | Y | C | E    | 1023 |
| 1008 | C | P | P | G | F | T | G | S | Y | C | Q    | 1018 |
| 1007 | C | L | P | G | F | T | G | I | Y | C | Q    | 1017 |
| 1906 | - | - | - | - | - | - | - | D | A | G | 1909 |      |

Thr1014Met

Patient No.12

|       |      |   |   |   |   |   |   |   |   |   |   |   |      |
|-------|------|---|---|---|---|---|---|---|---|---|---|---|------|
| HUMAN | 1180 | C | S | E | E | I | D | E | C | L | S | H | 1190 |
| MACMU | 1180 | C | S | E | E | I | D | E | C | L | S | H | 1190 |
| MOUSE | 1180 | C | S | E | E | I | N | E | C | L | S | Q | 1190 |
| CHICK | 1183 | C | S | E | E | I | N | E | C | L | S | H | 1193 |
| ANOCA | 1184 | C | S | E | E | I | N | E | C | L | S | H | 1194 |
| XENLA | 1179 | C | S | E | E | I | N | E | C | L | S | H | 1189 |
| DANRE | 1178 | C | S | K | E | I | N | E | C | L | S | Q | 1188 |
| BILA  | 2152 | C | E | I | - | D | D | W | C | N | E | F | 2161 |

Asp1185Asn

Patient No.27

|      |   |   |   |   |   |   |   |   |   |   |   |      |
|------|---|---|---|---|---|---|---|---|---|---|---|------|
| 1378 | F | T | G | P | E | C | Q | F | P | A | S | 1388 |
| 1378 | F | T | G | P | E | C | Q | F | P | A | S | 1388 |
| 1378 | F | T | G | P | E | C | Q | F | P | A | S | 1388 |
| 1381 | F | T | G | P | E | C | Q | Y | P | A | S | 1391 |
| 1382 | F | T | G | P | E | C | E | F | P | S | S | 1392 |
| 1377 | Y | T | G | A | T | C | Q | Y | P | V | I | 1387 |
| 1376 | F | S | G | H | E | C | Q | T | R | M | D | 1386 |
| 2513 | F | Y | G | R | Y | - | M | T | V | D | P | 2522 |

Cys1383Tyr

Patient No.8

Patient No.19

|       |      |   |   |   |   |   |   |   |   |   |   |   |      |
|-------|------|---|---|---|---|---|---|---|---|---|---|---|------|
| HUMAN | 1400 | Q | G | T | C | E | P | T | S | - | - | E | 1408 |
| MACMU | 1400 | Q | G | T | C | E | P | T | S | - | - | E | 1408 |
| MOUSE | 1400 | Q | G | T | C | E | P | T | S | - | - | E | 1408 |
| CHICK | 1402 | G | G | T | C | E | F | L | S | D | - | A | 1411 |
| ANOCA | 1403 | Q | G | T | C | Q | F | A | K | E | P | P | 1413 |
| XENLA | 1398 | G | G | T | C | Q | F | F | A | - | - | E | 1406 |
| DANRE | 1397 | G | G | T | C | Q | P | I | S | - | - | D | 1405 |
| BILA  | 2533 | N | G | N | C | S | I | D | D | D | D | D | 2543 |

Pro1405His

Patient No.22

|      |   |   |   |   |   |   |   |   |   |   |   |      |
|------|---|---|---|---|---|---|---|---|---|---|---|------|
| 1952 | A | D | A | N | I | Q | D | N | M | G | R | 1962 |
| 1952 | A | D | A | N | I | Q | D | N | M | G | R | 1962 |
| 1942 | A | D | A | N | I | Q | D | N | M | G | R | 1952 |
| 1955 | A | D | A | N | I | Q | D | N | M | G | R | 1965 |
| 1958 | A | D | A | N | I | Q | D | H | M | G | K | 1968 |
| 1949 | A | D | A | N | I | Q | D | N | M | G | R | 1959 |
| 1939 | A | D | A | N | I | Q | D | N | M | G | R | 1949 |
| 3154 | T | Q | T | Y | H | F | E | Q | F | G | E | 3164 |

Gln1957Pro

Patient No.33

|       |      |   |   |   |   |   |   |   |   |   |   |   |      |
|-------|------|---|---|---|---|---|---|---|---|---|---|---|------|
| HUMAN | 2074 | Y | E | T | A | K | V | L | L | D | H | F | 2084 |
| MACMU | 2074 | Y | E | T | A | K | V | L | L | D | H | F | 2084 |
| MOUSE | 2064 | Y | E | T | A | K | V | L | L | D | H | F | 2074 |
| CHICK | 2077 | Y | E | T | A | K | V | L | L | D | H | F | 2087 |
| ANOCA | 1987 | - | - | - | - | - | - | - | - | - | - | - | 1987 |
| XENLA | 2071 | Y | E | T | A | K | V | L | L | D | H | F | 2081 |
| DANRE | 2062 | Y | E | T | A | K | V | L | L | D | H | F | 2072 |
| BILA  | 3373 | T | E | I | - | - | - | - | - | G | K | Y | 3378 |

Val2079Leu

**Supplementary Figure 6: Detected NOTCH1 mutation sites are well conserved between species.** Sequence homology of Notch1 mutation sites from different species is shown. HUMAN, *Homo sapiens*; MACMU, monkey; MOUSE, mouse; CHICK, chicken; ANOCA, lizard; XENLA, frog; DANRE, zebrafish; and BILA, *Trichinella*.



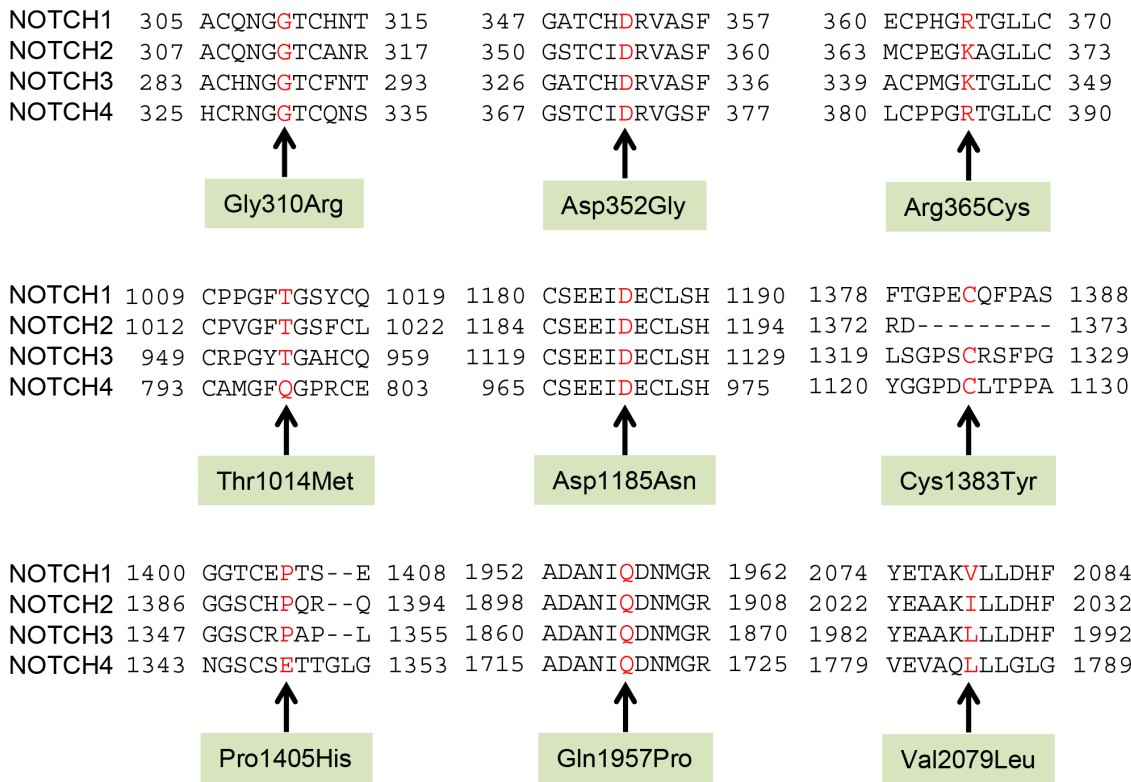

**Supplementary Figure 7: Detected *NOTCH1* mutation sites are well conserved throughout the Notch family.** Sequence homology of *NOTCH1* mutation sites with three human paralogs (*NOTCH2*, *NOTCH3*, and *NOTCH4*). The alignment was generated using the UniProt workflow.



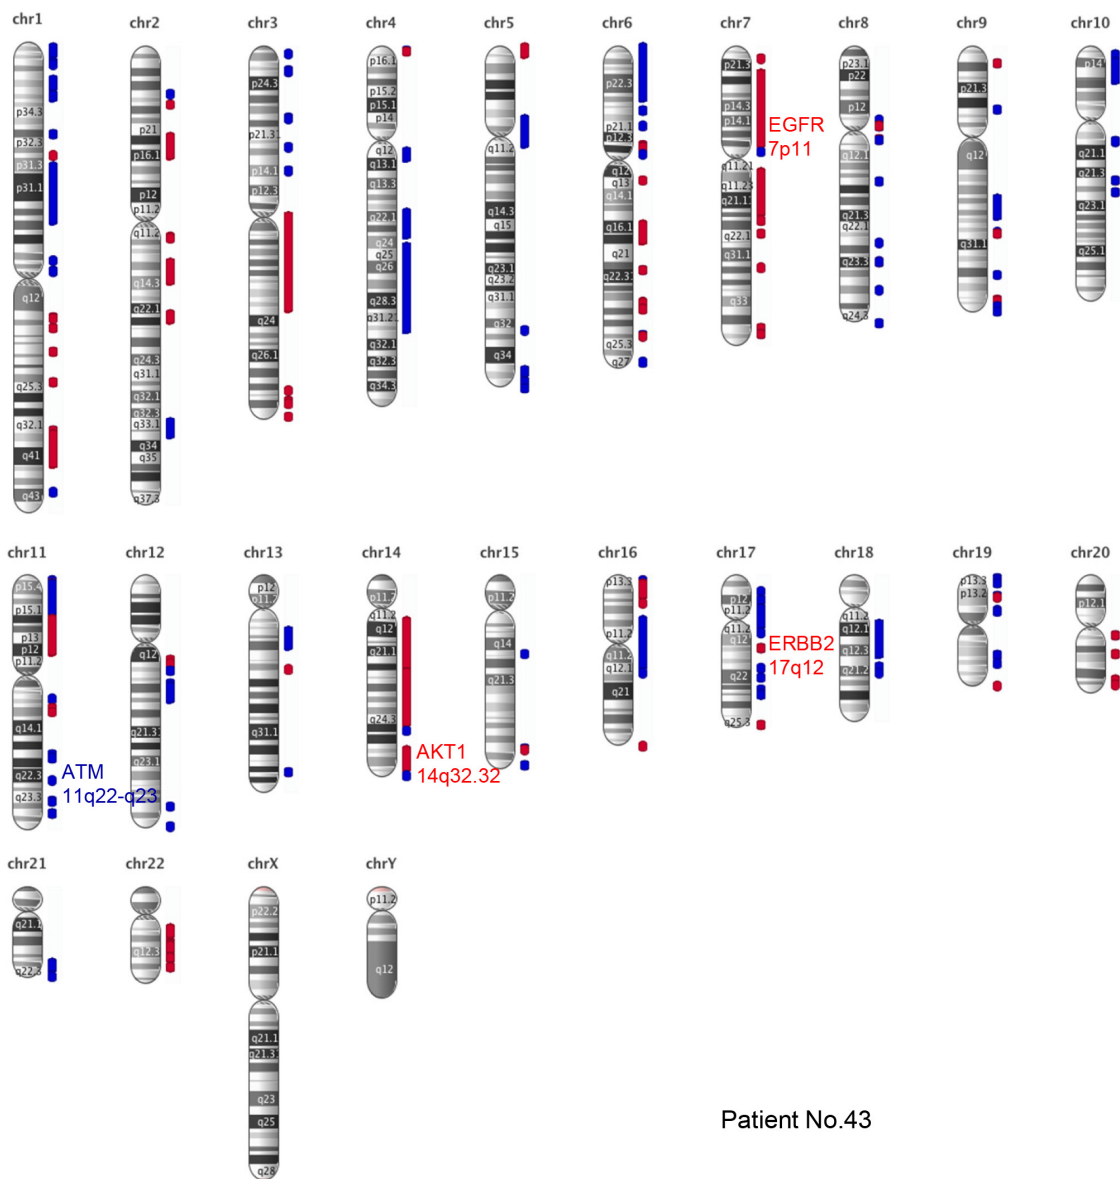

**Supplementary Figure 8: Example of an OSCC case with CNVs.** Visualization of CNVs over the entire genome in the karyotype view. The decreased and increased copy numbers are indicated in blue and red, respectively.

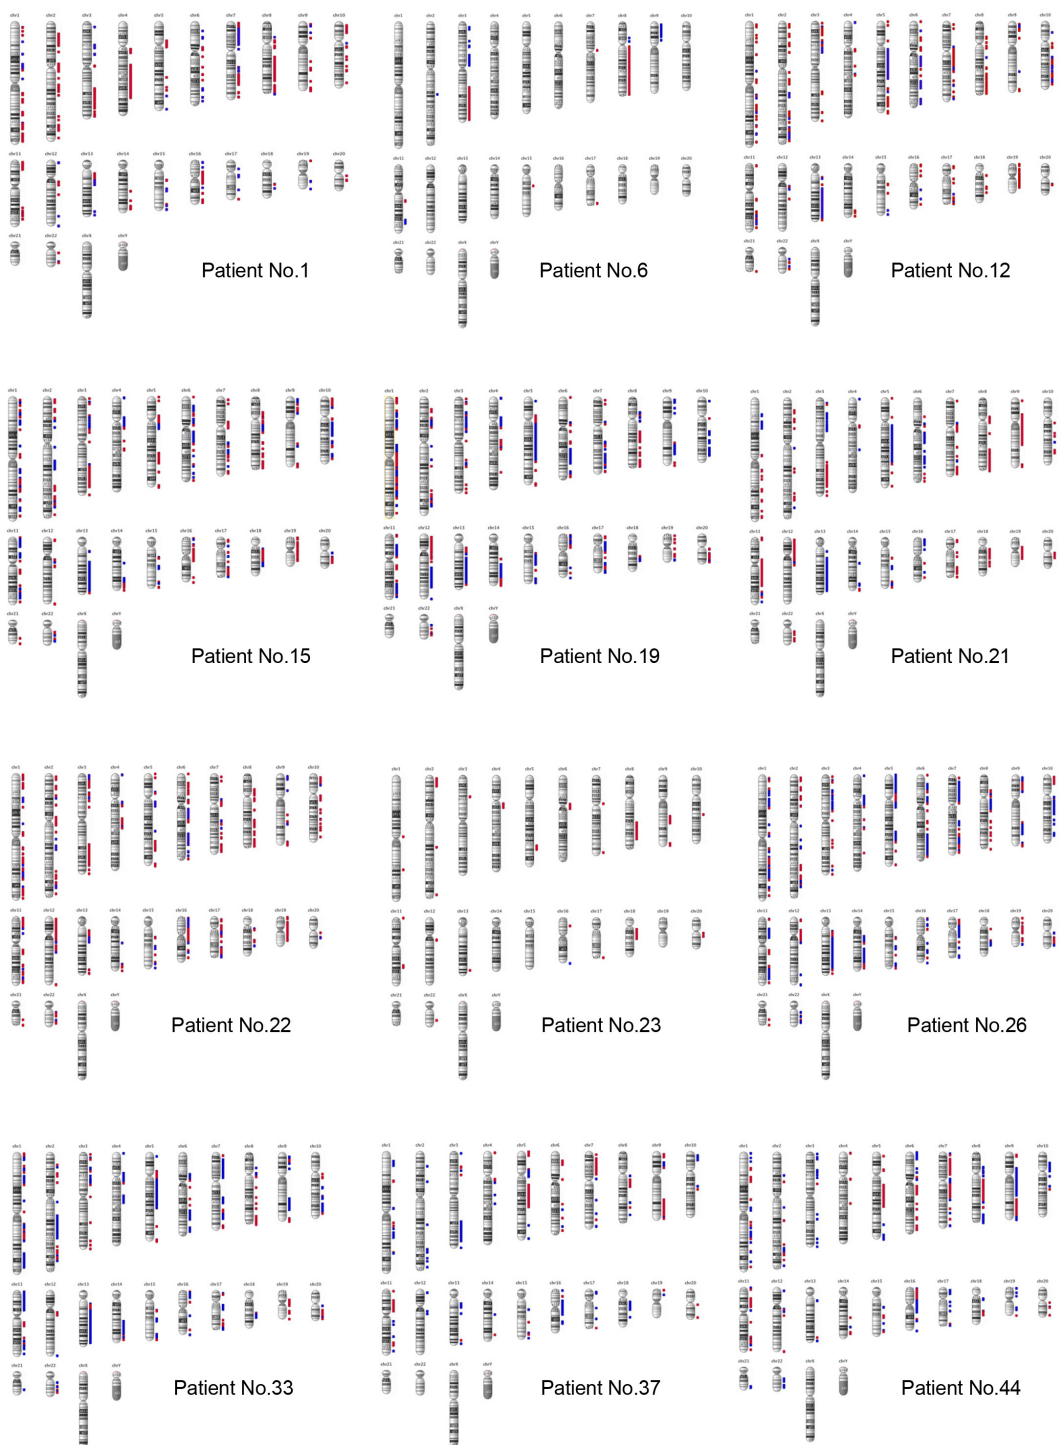

**Supplementary Figure 9: Examples of OSCC cases with CNVs.** Visualization of CNVs over the entire genome in the karyotype view. The decreased and increased copy numbers are indicated in blue and red, respectively.

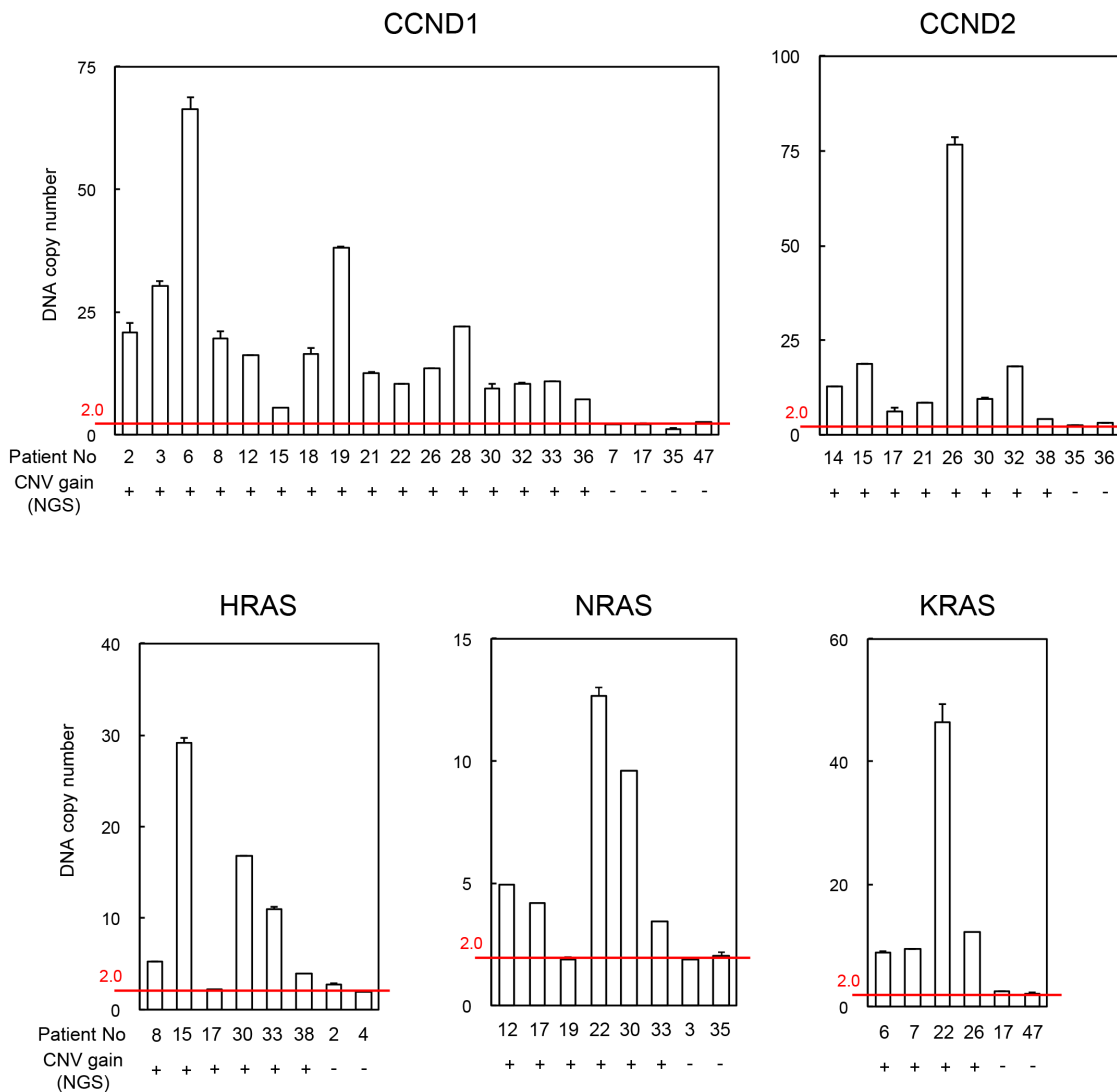

**Supplementary Figure 10: qPCR copy number analysis.** Relative DNA copy number was confirmed by quantitative real-time PCR using a KOD SYBR qPCR mix (Toyobo, Osaka, Japan) and the 7900HT real-time PCR system (Applied Biosystems). DNA content per haploid genome was normalized to that of a repetitive element, Line-1, and calculated by the comparative CT relative quantification method. DNA copy number relative to normal diploid leukocyte DNA was shown in Y axis. All assays were performed in triplicate. Copy number gains were considered when copy number was higher than 3.0 each gene. NGS results are presented at the bottom of the graph. The sequences of the primers used were as follows: *CCND1*, 5'- AATAAAAATTGCGGGTATTTCTG-3' (sense) and 5'- TCCCACGAAACGCTACTTCT-3' (antisense); *CCND2*, 5'- CTGTTTCTGAGTCTCTGCAGTCT-3' (sense) and 5'- CCCACACTTCCAGTTGCGAT-3' (antisense); *HRAS* 5'- CCTCAGCCGAAAACCAAGATC-3' (sense) and 5'- CTTGAACATCCCAAATGCCAC-3' (antisense); *NRAS*, 5'- TTCTGGCATCAGTCAAACGC-3' (sense) and 5'- ATCTGTCCAAAGCAGAGGCAG-3' (antisense); *KRAS*, 5'- AGAGCTGGCACAGACCAAAC-3' (sense) and 5'- AGGCCTTTGGTATACGACCCA-3' (antisense); *Line-1* as internal control, 5'- AAAGCCGCTCAACTACATGG-3' (sense) and 5'- TGCTTTGAATGCGTCCCAGAG-3' (antisense).

**A. CCND1**

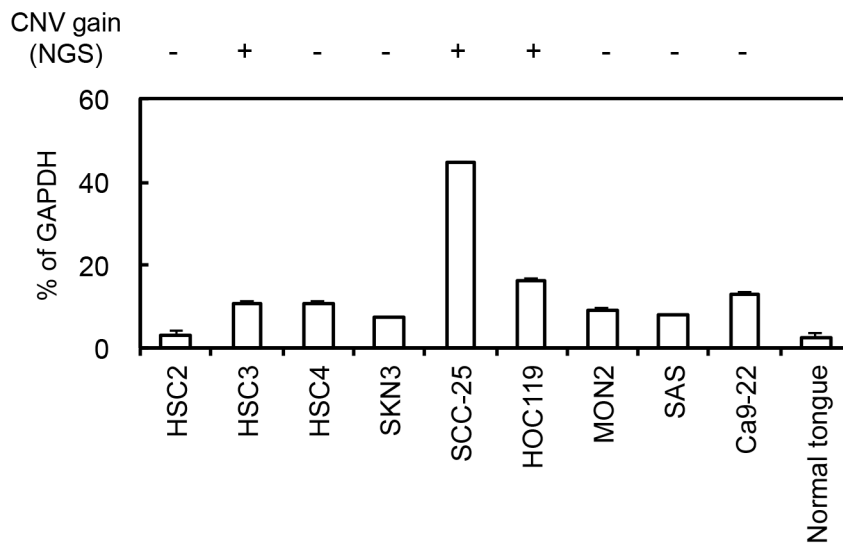

**B. CCND2**

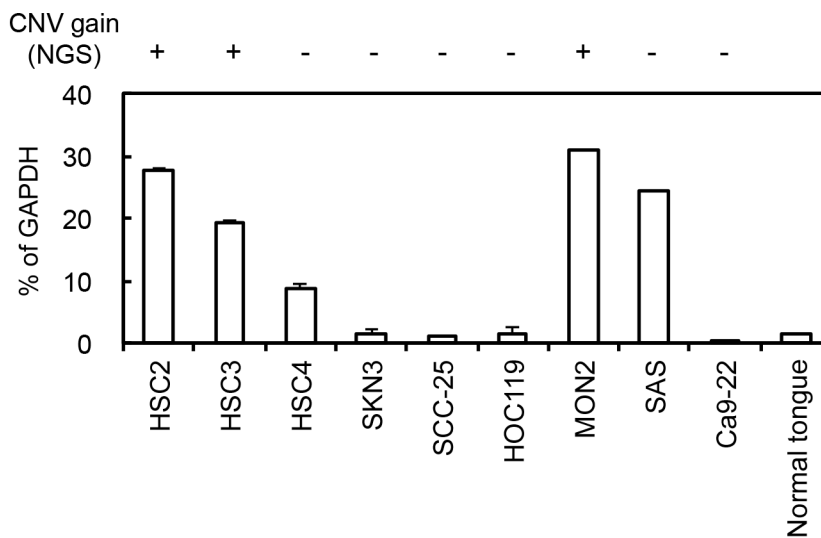

**Supplementary Figure 11: Expression of endogenous *CCND1* and *CCND2* in a panel of cell lines.** mRNA expression of *CCND1* (A) and *CCND2* (B) in OSCC cell lines was measured by real time RT-PCR using TaqMan Gene Expression assays and a 7900HT real-time PCR system (Applied Biosystems) according to the manufacturer’s protocol. CNV results from NGS are presented at the top of the graph. The primer/probe sets used were as follows: *CCND1*, Hs00765553\_m1; *CCND2*, Hs00153380\_m1; and *GAPDH*, Hs99999905\_m1. The data were normalized to the expression of the housekeeping gene *GAPDH* (% of *GAPDH*).

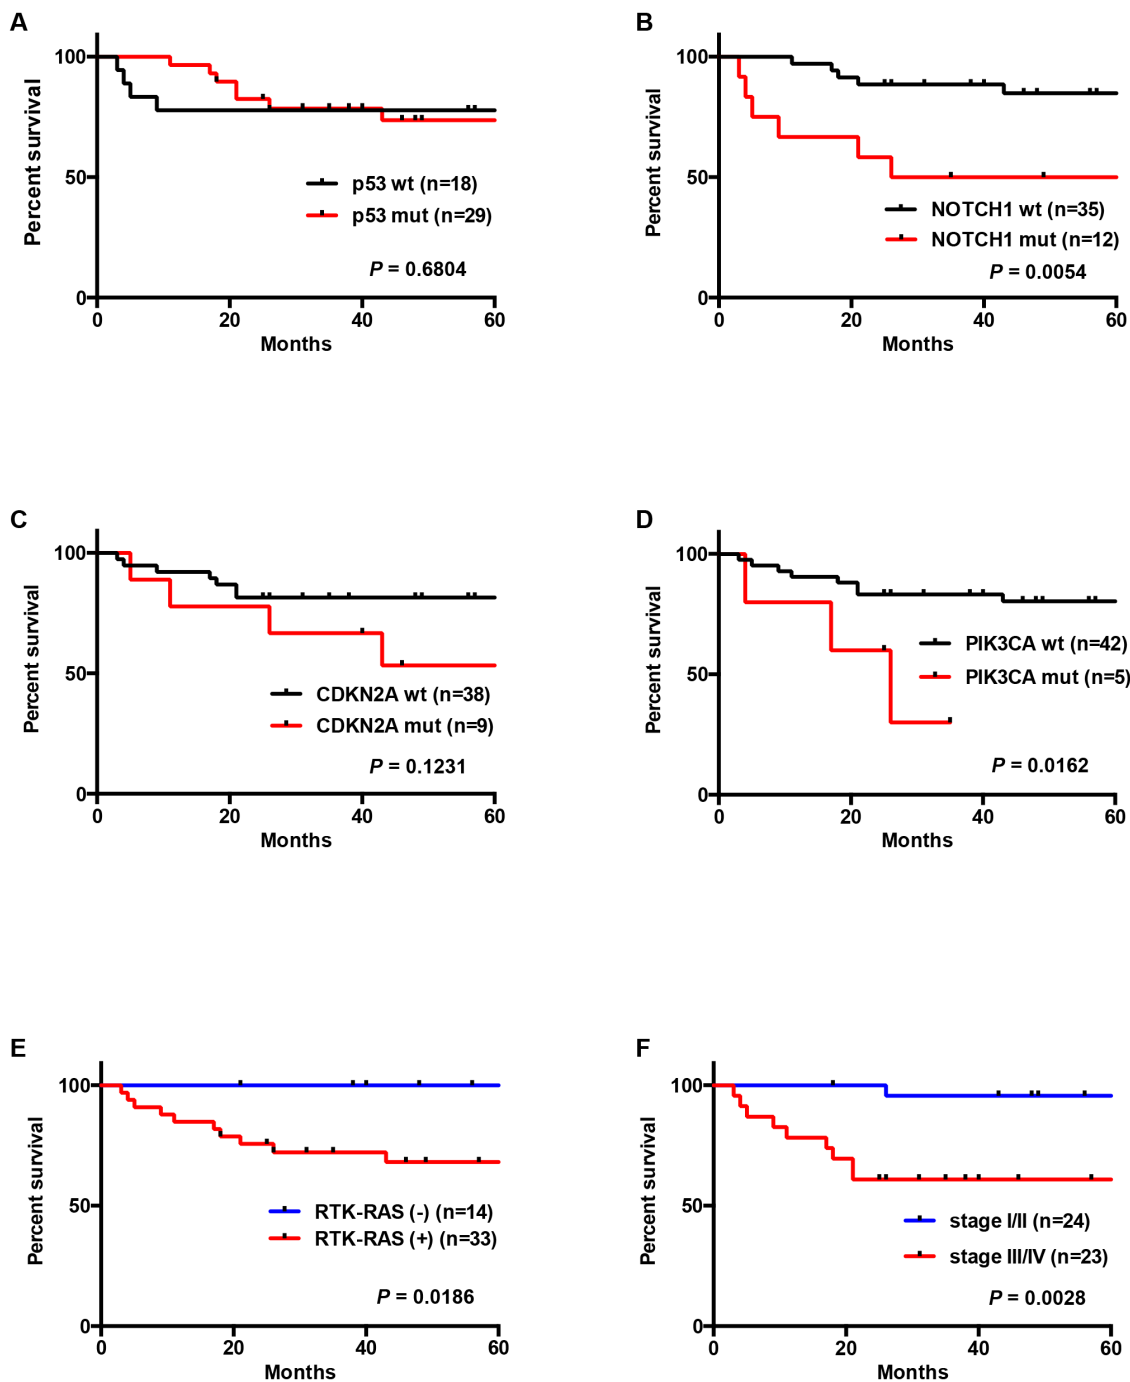

**Supplementary Figure 12: Kaplan–Meier curves of overall OSCC patient survival.** Kaplan–Meier estimates of overall survival among patients according to *TP53* mutation (A), *NOTCH1* mutation (B), *CDKN2A* mutation (C), *PIK3CA* mutation (D), RTK-RAS pathway alteration (E) and stage (F) ( $P$ , log-rank test). Analyses were carried out using Prism 6 (GraphPad Software, San Diego, CA, USA).

**Supplementary Table 1: Summary of targeted amplicon sequencing data for OSCC**

See Supplementary File 1

**Supplementary Table 2: Full description of targeted amplicon sequencing data for OSCC tissues**

See Supplementary File 2

**Supplementary Table 3: Validated mutations by Sanger sequencing**

See Supplementary File 3

**Supplementary Table 4: Somatic nonsynonymous mutations found in OSCC cell lines**

See Supplementary File 4

**Supplementary Table 5: Somatic nonsynonymous mutations found in 47 OSCC**

See Supplementary File 5

**Supplementary Table 6: *NOTCH1* mutations detected in this study**

See Supplementary File 6

**Supplementary Table 7: List of somatic mutations in *CDKN2A* and *PIK3CA* genes**

See Supplementary File 7
